# Supplementary material
Source: PubMed Central journal article supplement (PMC7425300)
Supplement: fcaa004_supplementary_data.pdf [file fcaa004_supplementary_data.pdf]

Supplemental Table 1. ANOVA values

|                          | <b>Age</b>  | <b>PMI</b>  |
|--------------------------|-------------|-------------|
| <b>Experimental unit</b> | <b>6</b>    | <b>6</b>    |
| <b>F value</b>           | <b>2.11</b> | <b>0.37</b> |
| <b>Degree of freedom</b> | <b>5</b>    | <b>5</b>    |
| <b>p value</b>           | <b>0.07</b> | <b>0.87</b> |
